# Supplementary material for: Emerging investigator series: meta-analyses on SARS-CoV-2 viral RNA levels in wastewater and their correlations to epidemiological indicators
Source: Royal Society of Chemistry journal article supplement (doi:10.1039/d2ew00084a), 2022-01-01
Supplement: d2ew00084a2.pdf [file d2ew00084a2.pdf]

**Supplementary tables for:**

**Meta-analyses on SARS-CoV-2 Viral Titers in Wastewater and Their Correlations to Epidemiological Indicators**

David Mantilla-Calderon, Kaiyu (Kevin) Huang, Aojie Li, Kaseba Chibwe, Xiaoqian Yu, Yinyin Ye, Lei Liu and Fangqiong Ling\*

**List of tables:**

|                                                                                |    |
|--------------------------------------------------------------------------------|----|
| Table S1: PRISMA checklist                                                     | 2  |
| Table S2: Inclusion exclusion criteria for records recovered                   | 5  |
| Table S3: Pearson's regression coefficients for individual and grouped studies | 18 |

**Table S1.** PRISMA Checklist for this study

| Section and Topic       | Item # | Checklist item                                                                                                                                                                                                                                                                                       | Location where item is reported |
|-------------------------|--------|------------------------------------------------------------------------------------------------------------------------------------------------------------------------------------------------------------------------------------------------------------------------------------------------------|---------------------------------|
| <b>TITLE</b>            |        |                                                                                                                                                                                                                                                                                                      |                                 |
| Title                   | 1      | Identify the report as a systematic review.                                                                                                                                                                                                                                                          | Yes                             |
| <b>ABSTRACT</b>         |        |                                                                                                                                                                                                                                                                                                      |                                 |
| <b>INTRODUCTION</b>     |        |                                                                                                                                                                                                                                                                                                      |                                 |
|                         |        |                                                                                                                                                                                                                                                                                                      |                                 |
| Rationale               | 3      | Describe the rationale for the review in the context of existing knowledge.                                                                                                                                                                                                                          | Yes                             |
| Objectives              | 4      | Provide an explicit statement of the objective(s) or question(s) the review addresses.                                                                                                                                                                                                               | Yes                             |
| <b>METHODS</b>          |        |                                                                                                                                                                                                                                                                                                      |                                 |
| Eligibility criteria    | 5      | Specify the inclusion and exclusion criteria for the review and how studies were grouped for the syntheses.                                                                                                                                                                                          | 2.2, 2.3                        |
| Information sources     | 6      | Specify all databases, registers, websites, organisations, reference lists and other sources searched or consulted to identify studies. Specify the date when each source was last searched or consulted.                                                                                            | 2.1                             |
| Search strategy         | 7      | Present the full search strategies for all databases, registers and websites, including any filters and limits used.                                                                                                                                                                                 | 2.1                             |
| Selection process       | 8      | Specify the methods used to decide whether a study met the inclusion criteria of the review, including how many reviewers screened each record and each report retrieved, whether they worked independently, and if applicable, details of automation tools used in the process.                     | 2.2                             |
| Data collection process | 9      | Specify the methods used to collect data from reports, including how many reviewers collected data from each report, whether they worked independently, any processes for obtaining or confirming data from study investigators, and if applicable, details of automation tools used in the process. | 2.3                             |
| Data items              | 10a    | List and define all outcomes for which data were sought. Specify whether all results that were compatible with each outcome domain in each study were sought (e.g. for all measures, time points, analyses), and if not, the methods used to decide which results to collect.                        | 2.4                             |
|                         | 10b    | List and define all other variables for which data were sought (e.g. participant and intervention characteristics, funding sources). Describe any assumptions made about any missing or unclear information.                                                                                         | 2.4                             |

|                               |     |                                                                                                                                                                                                                                                                   |                    |
|-------------------------------|-----|-------------------------------------------------------------------------------------------------------------------------------------------------------------------------------------------------------------------------------------------------------------------|--------------------|
| Study risk of bias assessment | 11  | Specify the methods used to assess risk of bias in the included studies, including details of the tool(s) used, how many reviewers assessed each study and whether they worked independently, and if applicable, details of automation tools used in the process. | NA                 |
| Effect measures               | 12  | Specify for each outcome the effect measure(s) (e.g. risk ratio, mean difference) used in the synthesis or presentation of results.                                                                                                                               | NA                 |
| Synthesis methods             | 13a | Describe the processes used to decide which studies were eligible for each synthesis (e.g. tabulating the study intervention characteristics and comparing against the planned groups for each synthesis (item #5)).                                              | 2.4                |
|                               | 13b | Describe any methods required to prepare the data for presentation or synthesis, such as handling of missing summary statistics, or data conversions.                                                                                                             | 2.5                |
|                               | 13c | Describe any methods used to tabulate or visually display results of individual studies and syntheses.                                                                                                                                                            | 2.4, 2.5, 2.6, 2.7 |
|                               | 13d | Describe any methods used to synthesize results and provide a rationale for the choice(s). If meta-analysis was performed, describe the model(s), method(s) to identify the presence and extent of statistical heterogeneity, and software package(s) used.       | 2.6, 2.7           |
|                               | 13e | Describe any methods used to explore possible causes of heterogeneity among study results (e.g. subgroup analysis, meta-regression).                                                                                                                              | 2.7                |
|                               | 13f | Describe any sensitivity analyses conducted to assess robustness of the synthesized results.                                                                                                                                                                      | 2.7                |
| Reporting bias assessment     | 14  | Describe any methods used to assess risk of bias due to missing results in a synthesis (arising from reporting biases).                                                                                                                                           | NA                 |
| Certainty assessment          | 15  | Describe any methods used to assess certainty (or confidence) in the body of evidence for an outcome.                                                                                                                                                             | NA                 |
| <b>RESULTS</b>                |     |                                                                                                                                                                                                                                                                   |                    |
| Study selection               | 16a | Describe the results of the search and selection process, from the number of records identified in the search to the number of studies included in the review, ideally using a flow diagram.                                                                      | 3.1                |
|                               | 16b | Cite studies that might appear to meet the inclusion criteria, but which were excluded, and explain why they were excluded.                                                                                                                                       | 3.1, 3.4           |
| Study characteristics         | 17  | Cite each included study and present its characteristics.                                                                                                                                                                                                         | 3.1                |
| Risk of bias in studies       | 18  | Present assessments of risk of bias for each included study.                                                                                                                                                                                                      | NA                 |
| Results of individual studies | 19  | For all outcomes, present, for each study: (a) summary statistics for each group (where appropriate) and (b) an effect estimate and its precision (e.g. confidence/credible interval), ideally using structured tables or plots.                                  | 3.2                |

|                                                |     |                                                                                                                                                                                                                                                                                      |     |
|------------------------------------------------|-----|--------------------------------------------------------------------------------------------------------------------------------------------------------------------------------------------------------------------------------------------------------------------------------------|-----|
| Results of syntheses                           | 20a | For each synthesis, briefly summarise the characteristics and risk of bias among contributing studies.                                                                                                                                                                               | NA  |
|                                                | 20b | Present results of all statistical syntheses conducted. If meta-analysis was done, present for each the summary estimate and its precision (e.g. confidence/credible interval) and measures of statistical heterogeneity. If comparing groups, describe the direction of the effect. | 3.2 |
|                                                | 20c | Present results of all investigations of possible causes of heterogeneity among study results.                                                                                                                                                                                       | 3.3 |
|                                                | 20d | Present results of all sensitivity analyses conducted to assess the robustness of the synthesized results.                                                                                                                                                                           | 3.3 |
| Reporting biases                               | 21  | Present assessments of risk of bias due to missing results (arising from reporting biases) for each synthesis assessed.                                                                                                                                                              | NA  |
| Certainty of evidence                          | 22  | Present assessments of certainty (or confidence) in the body of evidence for each outcome assessed.                                                                                                                                                                                  | NA  |
| <b>DISCUSSION</b>                              |     |                                                                                                                                                                                                                                                                                      |     |
| Discussion                                     | 23a | Provide a general interpretation of the results in the context of other evidence.                                                                                                                                                                                                    | 4.1 |
|                                                | 23b | Discuss any limitations of the evidence included in the review.                                                                                                                                                                                                                      | 4.4 |
|                                                | 23c | Discuss any limitations of the review processes used.                                                                                                                                                                                                                                | 4.4 |
|                                                | 23d | Discuss implications of the results for practice, policy, and future research.                                                                                                                                                                                                       | 4.3 |
| <b>OTHER INFORMATION</b>                       |     |                                                                                                                                                                                                                                                                                      |     |
| Registration and protocol                      | 24a | Provide registration information for the review, including register name and registration number, or state that the review was not registered.                                                                                                                                       | NA  |
|                                                | 24b | Indicate where the review protocol can be accessed, or state that a protocol was not prepared.                                                                                                                                                                                       | NA  |
|                                                | 24c | Describe and explain any amendments to information provided at registration or in the protocol.                                                                                                                                                                                      | NA  |
| Support                                        | 25  | Describe sources of financial or non-financial support for the review, and the role of the funders or sponsors in the review.                                                                                                                                                        | Yes |
| Competing interests                            | 26  | Declare any competing interests of review authors.                                                                                                                                                                                                                                   | Yes |
| Availability of data, code and other materials | 27  | Report which of the following are publicly available and where they can be found: template data collection forms; data extracted from included studies; data used for all analyses; analytic code; any other materials used in the review.                                           | NA  |

From: Page MJ, McKenzie JE, Bossuyt PM, Boutron I, Hoffmann TC, Mulrow CD, et al. The PRISMA 2020 statement: an updated guideline for reporting systematic reviews. *BMJ* 2021;372:n71. doi: 10.1136/bmj.n71

more information, visit: <http://www.prisma-statement.org/>

**Table S2.** Inclusion/exclusion criteria for records recovered from web of science. Refer to Table 1 for description of inclusion criteria.

| Author                                                                                                                                                                                              | Title                                                                                                                                                                                                         | Inclusion/Exclusion | C1 | C2 | C3 |
|-----------------------------------------------------------------------------------------------------------------------------------------------------------------------------------------------------|---------------------------------------------------------------------------------------------------------------------------------------------------------------------------------------------------------------|---------------------|----|----|----|
| Dada, AC; Gyawali, P                                                                                                                                                                                | Quantitative microbial risk assessment (QMRA) of occupational exposure to SARS-CoV-2 in wastewater treatment plants                                                                                           | C1, C2, C3          | N  | N  | N  |
| Kitamura, K; Sadamasu, K; Muramatsu, M; Yoshida, H                                                                                                                                                  | Efficient detection of SARS-CoV-2 RNA in the solid fraction of wastewater                                                                                                                                     | Include             | Y  | Y  | Y  |
| Ahmed, W; Tschärke, B; Bertsch, PM; Bibby, K; Bivins, A; Choi, P; Clarke, L; Dwyer, J; Edson, J; Nguyen, TMH; O'Brien, JW; Simpson, SL; Sherman, P; Thomas, KV; Verhagen, R; Zaugg, JL; Mueller, JF | SARS-CoV-2 RNA monitoring in wastewater as a potential early warning system for COVID-19 transmission in the community: A temporal case study                                                                 | C1                  | N  | Y  | Y  |
| Albastaki, A; Naji, M; Lootah, R; Almeheiri, R; Almulla, H; Almarri, I; Alreyami, A; Aden, A; Alghafri, R                                                                                           | First confirmed detection of SARS-COV-2 in untreated municipal and aircraft wastewater in Dubai, UAE: The use of wastewater based epidemiology as an early warning tool to monitor the prevalence of COVID-19 | C3                  | Y  | Y  | N  |
| Baldovin, T; Amoruso, I; Fonzo, M; Buja, A; Baldo, V; Cocchio, S; Bertonecello, C                                                                                                                   | SARS-CoV-2 RNA detection and persistence in wastewater samples: An experimental network for COVID-19 environmental surveillance in Padua, Veneto Region (NE Italy)                                            | Include             | Y  | Y  | Y  |
| Espinosa, MF; Verbyla, ME; Vassalle, L; Rosa-Machado, AT; Zhao, F; Gaunin, A; Mota, CR                                                                                                              | Reduction and partitioning of viral and bacterial indicators in a UASB reactor followed by high rate algal ponds treating domestic sewage                                                                     | C1, C2, C3          | N  | N  | N  |
| Mathavarajah, S; Stoddart, AK; Gagnon, GA; Dellaire, G                                                                                                                                              | Pandemic danger to the deep: The risk of marine mammals contracting SARS-CoV-2 from wastewater                                                                                                                | C1, C2, C3          | N  | N  | N  |
| Philo, SE; Keim, EK; Swannstrom, R; Ong, AQW; Burnor, EA; Kossik, AL; Harrison, JC; Demeke, BA; Zhou, NA; Beck, NK; Shirai, JH; Meschke, JS                                                         | A comparison of SARS-CoV-2 wastewater concentration methods for environmental surveillance                                                                                                                    | C3                  | Y  | Y  | N  |

| Author                                                                                                                                                                                                                          | Title                                                                                                                                                                                  | Inclusion/Exclusion | C1 | C2 | C3 |
|---------------------------------------------------------------------------------------------------------------------------------------------------------------------------------------------------------------------------------|----------------------------------------------------------------------------------------------------------------------------------------------------------------------------------------|---------------------|----|----|----|
| Hata, A; Hara-Yamamura, H; Meuchi, Y; Imai, S; Honda, R                                                                                                                                                                         | Detection of SARS-CoV-2 in wastewater in Japan during a COVID-19 outbreak                                                                                                              | Include             | Y  | Y  | Y  |
| Perez-Cataluna, A; Cuevas-Ferrando, E; Randazzo, W; Falco, I; Allende, A; Sanchez, G                                                                                                                                            | Comparing analytical methods to detect SARS-CoV-2 in wastewater                                                                                                                        | C1, C2, C3          | N  | N  | N  |
| Barril, PA; Pianciola, LA; Mazzeo, M; Ousset, MJ; Jaureguierry, MV; Alessandrello, M; Sanchez, G; Oteiza, JM                                                                                                                    | Evaluation of viral concentration methods for SARS-CoV-2 recovery from wastewaters                                                                                                     | C3                  | Y  | Y  | N  |
| Torii, S; Furumai, H; Katayama, H                                                                                                                                                                                               | Applicability of polyethylene glycol precipitation followed by acid guanidinium thiocyanate-phenol-chloroform extraction for the detection of SARS-CoV-2 RNA from municipal wastewater | C1, C3              | N  | Y  | N  |
| Goncalves, J; Koritnik, T; Mioc, V; Trkov, M; Boljesic, M; Berginc, N; Prosenec, K; Kotar, T; Paragi, M                                                                                                                         | Detection of SARS-CoV-2 RNA in hospital wastewater from a low COVID-19 disease prevalence area                                                                                         | Include             | Y  | Y  | Y  |
| Elsamadony, M; Fujii, M; Miura, T; Watanabe, T                                                                                                                                                                                  | Possible transmission of viruses from contaminated human feces and sewage: Implications for SARS-CoV-2                                                                                 | C1, C2, C3          | N  | N  | N  |
| Han, J; He, SS                                                                                                                                                                                                                  | Urban flooding events pose risks of virus spread during the novel coronavirus (COVID-19) pandemic                                                                                      | C1, C2, C3          | N  | N  | N  |
| Jafferli, MH; Khatami, K; Atasoy, M; Birgersson, M; Williams, C; Cetecioglu, Z                                                                                                                                                  | Benchmarking virus concentration methods for quantification of SARS-CoV-2 in raw wastewater                                                                                            | C3                  | Y  | Y  | N  |
| Petala, M; Dafou, D; Kostoglou, M; Karapantsios, T; Kanata, E; Chatziefstathiou, A; Sakaveli, F; Kotoulas, K; Arsenakis, M; Roilides, E; Sklaviadis, T; Metallidis, S; Papa, A; Stylianidis, E; Papadopoulos, A; Papaioannou, N | A physicochemical model for rationalizing SARS-CoV-2 concentration in sewage. Case study: The city of Thessaloniki in Greece                                                           | C3                  | Y  | Y  | N  |

| Author                                                                                                                                                                                          | Title                                                                                                                                                                     | Inclusion/Exclusion | C1 | C2 | C3 |
|-------------------------------------------------------------------------------------------------------------------------------------------------------------------------------------------------|---------------------------------------------------------------------------------------------------------------------------------------------------------------------------|---------------------|----|----|----|
| Ihsanullah, I; Bilal, M; Naushad, M                                                                                                                                                             | Coronavirus 2 (SARS-CoV-2) in water environments: Current status, challenges and research opportunities                                                                   | C1, C2, C3          | N  | N  | N  |
| Saguti, F; Magnil, E; Enache, L; Churqui, MP; Johansson, A; Lumley, D; Davidsson, F; Dotevall, L; Mattsson, A; Trybala, E; Lagging, M; Lindh, M; Gisslen, M; Brezicka, T; Nystrom, K; Norder, H | Surveillance of wastewater revealed peaks of SARS-CoV-2 preceding those of hospitalized patients with COVID-19                                                            | Include             | Y  | Y  | Y  |
| Kumar, M; Kuroda, K; Patel, AK; Patel, N; Bhattacharya, P; Joshi, M; Joshi, CG                                                                                                                  | Decay of SARS-CoV-2 RNA along the wastewater treatment outfitted with Upflow Anaerobic Sludge Blanket (UASB) system evaluated through two sample concentration techniques | C1, C3              | N  | Y  | N  |
| Zaneti, RN; Girardi, V; Spilki, FR; Mena, K; Westphalen, APC; Colares, ERD; Pozzebon, AG; Etchepare, RG                                                                                         | Quantitative microbial risk assessment of SARS-CoV-2 for workers in wastewater treatment plants                                                                           | C1, C2, C3          | N  | N  | N  |
| Feng, BH; Xu, KJ; Gu, SL; Zheng, SF; Zou, QD; Xu, Y; Yu, L; Lou, FY; Yu, F; Jin, T; Li, YG; Sheng, JF; Yen, HL; Zhong, ZF; Wei, JJ; Chen, Y                                                     | Multi-route transmission potential of SARS-CoV-2 in healthcare facilities                                                                                                 | C3                  | Y  | Y  | N  |
| Westhaus, S; Weber, FA; Schiwy, S; Linnemann, V; Brinkmann, M; Widera, M; Greve, C; Janke, A; Hollert, H; Wintgens, T; Ciesek, S                                                                | Detection of SARS-CoV-2 in raw and treated wastewater in Germany - Suitability for COVID-19 surveillance and potential transmission risks                                 | Include             | Y  | Y  | Y  |
| Zahedi, A; Monis, P; Deere, D; Ryan, U                                                                                                                                                          | Wastewater-based epidemiology-surveillance and early detection of waterborne pathogens with a focus on SARS-CoV-2, Cryptosporidium and Giardia                            | C1, C2, C3          | N  | N  | N  |
| Graham, KE; Loeb, SK; Wolfe, MK; Catoe, D; Sinnott-Armstrong, N; Kim, S; Yamahara, KM; Sassoubre, LM; Grijalva, LMM; Roldan-Hernandez, L; Langenfeld, K; Wigginton, KR; Boehm, AB               | SARS-CoV-2 RNA in Wastewater Settled Solids Is Associated with COVID-19 Cases in a Large Urban Sewershed                                                                  | Include             | Y  | Y  | Y  |
| Faleye, TOC; Driver, E; Bowes, D; Adhikari, S; Adams, D; Varsani, A; Halden, RU; Scotch, M                                                                                                      | Pan-Enterovirus Amplicon-Based High-Throughput Sequencing Detects the Complete Capsid of a EVA71 Genotype C1 Variant via Wastewater-Based Epidemiology in Arizona         | C1, C2, C3          | N  | N  | N  |

| Author                                                                                                                                                                                                       | Title                                                                                                                                          | Inclusion/Exclusion | C1 | C2 | C3 |
|--------------------------------------------------------------------------------------------------------------------------------------------------------------------------------------------------------------|------------------------------------------------------------------------------------------------------------------------------------------------|---------------------|----|----|----|
| D'Aoust, PM; Mercier, E; Montpetit, D; Jia, JJ; Alexandrov, I; Neault, N; Baig, AT; Mayne, J; Zhang, X; Alain, T; Langlois, MA; Servos, MR; MacKenzie, M; Figeys, D; MacKenzie, AE; Graber, TE; Delatolla, R | Quantitative analysis of SARS-CoV-2 RNA from wastewater solids in communities with low COVID-19 incidence and prevalence                       | Include             | Y  | Y  | Y  |
| La Rosa, G; Mancini, P; Ferraro, GB; Veneri, C; Iaconelli, M; Bonadonna, L; Lucentini, L; Suffredini, E                                                                                                      | SARS-CoV-2 has been circulating in northern Italy since December 2019: Evidence from environmental monitoring                                  | C3                  | Y  | Y  | N  |
| Volkoff, SJ; Carlson, TJ; Leik, K; Smith, JJ; Graves, D; Dennis, P; Aris, T; Cuthbertson, D; Holmes, A; Craig, K; Marvin, B; Nesbit, E                                                                       | Demonstrated SARS-CoV-2 Surface Disinfection Using Ozone                                                                                       | C1, C2, C3          | N  | N  | N  |
| Jones, DL; Baluja, MQ; Graham, DW; Corbishley, A; McDonald, JE; Malham, SK; Hillary, LS; Connor, TR; Gaze, WH; Moura, IB; Wilcox, MH; Farkas, K                                                              | Shedding of SARS-CoV-2 in feces and urine and its potential role in person-to-person transmission and the environment-based spread of COVID-19 | C1, C2, C3          | N  | N  | N  |
| Liu, DS; Thompson, JR; Carducci, A; Bi, XJ                                                                                                                                                                   | Potential secondary transmission of SARS-CoV-2 via wastewater                                                                                  | C1, C2, C3          | N  | N  | N  |
| Pons, MN; Louis, P; Vignati, D                                                                                                                                                                               | Effect of lockdown on wastewater characteristics: a comparison of two large urban areas                                                        | C1, C2, C3          | N  | N  | N  |
| Arora, S; Nag, A; Sethi, J; Rajvanshi, J; Saxena, S; Shrivastava, SK; Gupta, AB                                                                                                                              | Sewage surveillance for the presence of SARS-CoV-2 genome as a useful wastewater based epidemiology (WBE) tracking tool in India               | C3                  | Y  | Y  | N  |
| Lu, DN; Huang, ZR; Luo, JY; Zhang, XQ; Sha, S                                                                                                                                                                | Primary concentration - The critical step in implementing the wastewater based epidemiology for the COVID-19 pandemic: A mini-review           | C1, C2, C3          | N  | N  | N  |



| Author                                                                                                                                                                                                             | Title                                                                                                                                       | Inclusion/Exclusion | C1 | C2 | C3 |
|--------------------------------------------------------------------------------------------------------------------------------------------------------------------------------------------------------------------|---------------------------------------------------------------------------------------------------------------------------------------------|---------------------|----|----|----|
| Bivins, A; Greaves, J; Fischer, R; Yinda, KC; Ahmed, W; Kitajima, M; Munster, VJ; Bibby, K                                                                                                                         | Persistence of SARS-CoV-2 in Water and Wastewater                                                                                           | C1, C2, C3          | N  | N  | N  |
| Lesimple, A; Jasim, SY; Johnson, DJ; Hilal, N                                                                                                                                                                      | The role of wastewater treatment plants as tools for SARS-CoV-2 early detection and removal                                                 | C1, C2, C3          | N  | N  | N  |
| Olusola-Makinde, OO; Reuben, RC                                                                                                                                                                                    | Ticking bomb: Prolonged faecal shedding of novel coronavirus (2019-nCoV) and environmental implications                                     | C1, C2, C3          | N  | N  | N  |
| Ahmed, W; Bertsch, PM; Bibby, K; Haramoto, E; Hewitt, J; Huygens, F; Gyawali, P; Korajkic, A; Riddell, S; Sherchan, SP; Simpson, SL; Sirikanchana, K; Symonds, EM; Verhagen, R; Vasana, SS; Kitajima, M; Bivins, A | Decay of SARS-CoV-2 and surrogate murine hepatitis virus RNA in untreated wastewater to inform application in wastewater-based epidemiology | C1, C3              | N  | Y  | N  |
| Trottier, J; Darques, R; Mouheb, NA; Partiot, E; Bakhache, W; Deffieu, MS; Gaudin, R                                                                                                                               | Post-lockdown detection of SARS-CoV-2 RNA in the wastewater of Montpellier, France                                                          | Include             | Y  | Y  | Y  |
| Mao, K; Zhang, H; Yang, ZG                                                                                                                                                                                         | An integrated biosensor system with mobile health and wastewater-based epidemiology (iBMW) for COVID-19 pandemic                            | C1, C2, C3          | N  | N  | N  |
| Kumar, M; Patel, AK; Shah, AV; Raval, J; Rajpara, N; Joshi, M; Joshi, CG                                                                                                                                           | First proof of the capability of wastewater surveillance for COVID-19 in India through detection of genetic material of SARS-CoV-2          | Include             | Y  | Y  | Y  |
| Sun, SY; Han, J                                                                                                                                                                                                    | Open defecation and squat toilets, an overlooked risk of fecal transmission of COVID-19 and other pathogens in developing communities       | C1, C2, C3          | N  | N  | N  |

| Author                                                                                                             | Title                                                                                                                                                               | Inclusion/Exclusion | C1 | C2 | C3 |
|--------------------------------------------------------------------------------------------------------------------|---------------------------------------------------------------------------------------------------------------------------------------------------------------------|---------------------|----|----|----|
| Corpuz, MVA; Buonerba, A; Vigliotta, G; Zarra, T; Ballesteros, F; Campiglia, P; Belgiomo, V; Korshin, G; Naddeo, V | Viruses in wastewater: occurrence, abundance and detection methods                                                                                                  | C1, C2, C3          | N  | N  | N  |
| Usman, M; Farooq, M; Hanna, K                                                                                      | Environmental side effects of the injudicious use of antimicrobials in the era of COVID-19                                                                          | C1, C2, C3          | N  | N  | N  |
| Baj, A; Azzi, L; Dalla Gasperina, D; Genoni, A; Tamborini, A; Gambarini, C; Carcano, G; Grossi, P; Sessa, F        | Pilot Study: Long-Term Shedding of SARS-CoV-2 in Urine: A Threat for Dispersal in Wastewater                                                                        | C1, C2, C3          | N  | N  | N  |
| Patel, PP; Mondal, S; Ghosh, KG                                                                                    | Some respite for India's dirtiest river? Examining the Yamuna's water quality at Delhi during the COVID-19 lockdown period                                          | C1, C2, C3          | N  | N  | N  |
| Arslan, M; Xu, B; El-Din, MG                                                                                       | Transmission of SARS-CoV-2 via fecal-oral and aerosols-borne routes: Environmental dynamics and implications for wastewater management in underprivileged societies | C1, C2, C3          | N  | N  | N  |
| Guerrero-Latorre, L; Ballesteros, I; Villacres-Granda, I; Granda, MG; Freire-Paspuel, B; Rios-Touma, B             | SARS-CoV-2 in river water: Implications in low sanitation countries                                                                                                 | C1, C2, C3          | N  | N  | N  |
| Street, R; Malema, S; Mahlangeni, N; Mathee, A                                                                     | Wastewater surveillance for Covid-19: An African perspective                                                                                                        | C1, C2, C3          | N  | N  | N  |
| Sherchan, SP; Shahin, S; Ward, LM; Tandukar, S; Aw, TG; Schmitz, B; Ahmed, W; Kitajima, M                          | First detection of SARS-CoV-2 RNA in wastewater in North America: A study in Louisiana, USA                                                                         | Include             | Y  | Y  | Y  |
| Adelodun, B; Ajibade, FO; Ibrahim, RG; Bakare, HO; Choi, KS                                                        | Snowballing transmission of COVID-19 (SARS-CoV-2) through wastewater: Any sustainable preventive measures to curtail the scourge in low-income countries?           | C1, C2, C3          | N  | N  | N  |

| Author                                                                                                                                                          | Title                                                                                                                                                                                                      | Inclusion/Exclusion | C1 | C2 | C3 |
|-----------------------------------------------------------------------------------------------------------------------------------------------------------------|------------------------------------------------------------------------------------------------------------------------------------------------------------------------------------------------------------|---------------------|----|----|----|
| Miyani, B; Fonoll, X; Norton, J; Mehrotra, A; Xagorarakis, I                                                                                                    | SARS-CoV-2 in Detroit Wastewater                                                                                                                                                                           | Include             | Y  | Y  | Y  |
| Polo, D; Quintela-Baluja, M; Corbishley, A; Jones, DL; Singer, AC; Graham, DW; Romalde, JL                                                                      | Making waves: Wastewater-based epidemiology for COVID-19-approaches and challenges for surveillance and prediction                                                                                         | C1, C2, C3          | N  | N  | N  |
| Collivignarelli, MC; Collivignarelli, C; Miino, MC; Abba, A; Pedrazzani, R; Bertanza, G                                                                         | SARS-CoV-2 in sewer systems and connected facilities                                                                                                                                                       | C1, C2, C3          | N  | N  | N  |
| Capalbo, C; Bertamino, E; Zerbetto, A; Santino, I; Petrucca, A; Mancini, R; Bonfini, R; Alfonsi, V; Ferracuti, S; Marchetti, P; Simmaco, M; Orsi, GB; Napoli, C | No Evidence of SARS-CoV-2 Circulation in Rome (Italy) during the Pre-Pandemic Period: Results of a Retrospective Surveillance                                                                              | C1, C2, C3          | N  | N  | N  |
| Wang, SR; Green, HC; Wilder, ML; Du, Q; Kmush, BL; Collins, MB; Larsen, DA; Zeng, T                                                                             | High-throughput wastewater analysis for substance use assessment in central New York during the COVID-19 pandemic                                                                                          | C1, C2, C3          | N  | N  | N  |
| Gonzalez, R; Curtis, K; Bivins, A; Bibby, K; Weir, MH; Yetka, K; Thompson, H; Keeling, D; Mitchell, J; Gonzalez, D                                              | COVID-19 surveillance in Southeastern Virginia using wastewater-based epidemiology                                                                                                                         | Include             | Y  | Y  | Y  |
| Zhang, DY; Ling, HB; Huang, X; Li, J; Li, WW; Yi, C; Zhang, T; Jiang, YZ; He, YN; Deng, SQ; Zhang, X; Wang, XZ; Liu, Y; Li, GH; Qu, JH                          | Potential spreading risks and disinfection challenges of medical wastewater by the presence of Severe Acute Respiratory Syndrome Coronavirus 2 (SARS-CoV-2) viral RNA in septic tanks of Fangcang Hospital | C3                  | Y  | Y  | N  |
| Kaplan, EH; Wang, D; Wang, MK; Malik, AA; Zulli, A; Peccia, J                                                                                                   | Aligning SARS-CoV-2 indicators via an epidemic model: application to hospital admissions and RNA detection in sewage sludge                                                                                | C1                  | N  | Y  | Y  |

| Author                                                                                                                                                                                                          | Title                                                                                                                                                    | Inclusion/Exclusion | C1 | C2 | C3 |
|-----------------------------------------------------------------------------------------------------------------------------------------------------------------------------------------------------------------|----------------------------------------------------------------------------------------------------------------------------------------------------------|---------------------|----|----|----|
| Ul-Rahman, A; Shabbir, MA; Aziz, MW; Yaqub, S; Mehmood, A; Raza, MA; Shabbir, MZ                                                                                                                                | A comparative phylogenomic analysis of SARS-CoV-2 strains reported from non-human mammalian species and environmental samples                            | C1, C2, C3          | N  | N  | N  |
| Belhadi, A; Kamble, SS; Khan, SAR; Touriki, FE; Kumar, MD                                                                                                                                                       | Infectious Waste Management Strategy during COVID-19 Pandemic in Africa: an Integrated Decision-Making Framework for Selecting Sustainable Technologies  | C1, C2, C3          | N  | N  | N  |
| Cazares, LH; Chaerkady, R; Weng, SHS; Boo, CC; Cimbrow, R; Hsu, HE; Rajan, S; Dall'Acqua, W; Clarke, L; Ren, KS; McTamney, P; Kallewaard-LeLay, N; Ghaedi, M; Ikeda, Y; Hess, S                                 | Development of a Parallel Reaction Monitoring Mass Spectrometry Assay for the Detection of SARS-CoV-2 Spike Glycoprotein and Nucleoprotein               | C1, C2, C3          | N  | N  | N  |
| Cahill, N; Morris, D                                                                                                                                                                                            | Recreational waters - A potential transmission route for SARS-CoV-2 to humans?                                                                           | C1, C2, C3          | N  | N  | N  |
| Ahmed, W; Bertsch, PM; Bivins, A; Bibby, K; Farkas, K; Gathercole, A; Haramoto, E; Gyawali, P; Korajkic, A; McMinn, BR; Mueller, JF; Simpson, SL; Smith, WJM; Symonds, EM; Thomas, KV; Verhagen, R; Kitajima, M | Comparison of virus concentration methods for the RT-qPCR-based recovery of murine hepatitis virus, a surrogate for SARS-CoV-2 from untreated wastewater | C1, C2, C3          | N  | N  | N  |
| Maal-Bared, R; Brisolaro, K; Munakata, N; Bibby, K; Gerba, C; Sobsey, M; Schaefer, S; Swift, J; Gary, L; Sherchan, S; Babatola, A; Bastian, R; Olabode, L; Reimers, R; Rubin, A                                 | Implications of SARS-CoV-2 on current and future operation and management of wastewater systems                                                          | C1, C2, C3          | N  | N  | N  |
| Larson, RC; Berman, O; Nourinejad, M                                                                                                                                                                            | Sampling manholes to home in on SARS-CoV-2 infections                                                                                                    | C1, C2, C3          | N  | N  | N  |
| Martinez-Hernandez, F; Isaak-Delgado, AB; Alfonso-Toledo, JA; Munoz-Garcia, CI; Villalobos, G; Arechiga-Ceballos, N; Rendon-Franco, E                                                                           | Assessing the SARS-CoV-2 threat to wildlife: Potential risk to a broad range of mammals                                                                  | C1, C2, C3          | N  | N  | N  |

| Author                                                                                                                                                                   | Title                                                                                                                                                            | Inclusion/Exclusion | C1 | C2 | C3 |
|--------------------------------------------------------------------------------------------------------------------------------------------------------------------------|------------------------------------------------------------------------------------------------------------------------------------------------------------------|---------------------|----|----|----|
| Harries, AD; Berger, SD; Satyanarayana, S; Thekkur, P; Kumar, AMV                                                                                                        | Testing wastewater to detect severe acute respiratory syndrome coronavirus 2 in communities                                                                      | C1, C2, C3          | N  | N  | N  |
| Thompson, JR; Nancharaiah, YV; Gu, XQ; Lee, WL; Rajal, VB; Haines, MB; Girones, R; Ng, LC; Alm, EJ; Wuertz, S                                                            | Making waves: Wastewater surveillance of SARS-CoV-2 for population-based health management                                                                       | C1, C2, C3          | N  | N  | N  |
| Martin, J; Klapsa, D; Wilton, T; Zambon, M; Bentley, E; Bujaki, E; Fritzsche, M; Mate, R; Majumdar, M                                                                    | Tracking SARS-CoV-2 in Sewage: Evidence of Changes in Virus Variant Predominance during COVID-19 Pandemic                                                        | C1                  | N  | Y  | Y  |
| Michael-Kordatou, I; Karaolia, P; Fatta-Kassinos, D                                                                                                                      | Sewage analysis as a tool for the COVID-19 pandemic response and management: the urgent need for optimised protocols for SARS-CoV-2 detection and quantification | C1, C2, C3          | N  | N  | N  |
| Carraturo, F; Del Giudice, C; Morelli, M; Cerullo, V; Libralato, G; Galdiero, E; Guida, M                                                                                | Persistence of SARS-CoV-2 in the environment and COVID-19 transmission risk from environmental matrices and surfaces                                             | C1, C2, C3          | N  | N  | N  |
| Haramoto, E; Malla, B; Thakali, O; Kitajima, M                                                                                                                           | First environmental surveillance for the presence of SARS-CoV-2 RNA in wastewater and river water in Japan                                                       | Include             | Y  | Y  | Y  |
| Fernandez-de-Mera, IG; Del-Rio, FRJ; de la Fuente, J; Perez-Sancho, M; Hervas, D; Moreno, I; Dominguez, M; Dominguez, L; Gortazar, C                                     | Detection of environmental SARS-CoV-2 RNA in a high prevalence setting in Spain                                                                                  | C3                  | Y  | Y  | N  |
| Peccia, J; Zulli, A; Brackney, DE; Grubaugh, ND; Kaplan, EH; Casanovas-Massana, A; Ko, AI; Malik, AA; Wang, D; Wang, MK; Warren, JL; Weinberger, DM; Arnold, W; Omer, SB | Measurement of SARS-CoV-2 RNA in wastewater tracks community infection dynamics                                                                                  | Include             | Y  | Y  | Y  |
| Kumar, M; Mohapatra, S; Mazumder, P; Singh, A; Honda, R; Lin, CX; Kumari, R; Goswami, R; Jha, PK; Vithanage, M; Kuroda, K                                                | Making Waves Perspectives of Modelling and Monitoring of SARS-CoV-2 in Aquatic Environment for COVID-19 Pandemic                                                 | C1, C2, C3          | N  | N  | N  |

| Author                                                                                                                                    | Title                                                                                                                                                                | Inclusion/Exclusion | C1 | C2 | C3 |
|-------------------------------------------------------------------------------------------------------------------------------------------|----------------------------------------------------------------------------------------------------------------------------------------------------------------------|---------------------|----|----|----|
| Mouchtouri, VA; Koureas, M; Kyritsi, M; Vontas, A; Kourentis, L; Sapounas, S; Rigakos, G; Petinaki, E; Tsiodras, S; Hadjichristodoulou, C | Environmental contamination of SARS-CoV-2 on surfaces, air-conditioner and ventilation systems                                                                       | C1, C2, C3          | N  | N  | N  |
| Randazzo, W; Cuevas-Ferrando, E; Sanjuan, R; Domingo-Calap, P; Sanchez, G                                                                 | Metropolitan wastewater analysis for COVID-19 epidemiological surveillance                                                                                           | Include             | Y  | Y  | Y  |
| Race, M; Ferraro, A; Galdiero, E; Guida, M; Nunez-Delgado, A; Pirozzi, F; Siciliano, A; Fabbicino, M                                      | Current emerging SARS-CoV-2 pandemic: Potential direct/indirect negative impacts of virus persistence and related therapeutic drugs on the aquatic compartments      | C1, C2, C3          | N  | N  | N  |
| Franklin, AB; Bevins, SN                                                                                                                  | Spillover of SARS-CoV-2 into novel wild hosts in North America: A conceptual model for perpetuation of the pathogen                                                  | C1, C2, C3          | N  | N  | N  |
| Orive, G; Lertxundi, U; Barcelo, D                                                                                                        | Early SARS-CoV-2 outbreak detection by sewage -based epidemiology                                                                                                    | C1, C2, C3          | N  | N  | N  |
| Randazzo, W; Truchado, P; Cuevas-Ferrando, E; Simon, P; Allende, A; Sanchez, G                                                            | SARS-CoV-2 RNA in wastewater anticipated COVID-19 occurrence in a low prevalence area                                                                                | Include             | Y  | Y  | Y  |
| Hart, OE; Halden, RU                                                                                                                      | Computational analysis of SARS-CoV-2/COVID-19 surveillance by wastewater-based epidemiology locally and globally: Feasibility, economy, opportunities and challenges | C1, C2, C3          | N  | N  | N  |
| Heller, L; Mota, CR; Greco, DB                                                                                                            | COVID-19 faecal-oral transmission: Are we asking the right questions?                                                                                                | C1, C2, C3          | N  | N  | N  |

| Author                                                                                                                                                                                                          | Title                                                                                                                                                         | Inclusion/Exclusion | C1 | C2 | C3 |
|-----------------------------------------------------------------------------------------------------------------------------------------------------------------------------------------------------------------|---------------------------------------------------------------------------------------------------------------------------------------------------------------|---------------------|----|----|----|
| Feng, W; Newbigging, AM; Le, C; Pang, B; Peng, HY; Cao, YR; Wu, JJ; Abbas, G; Song, J; Wang, DB; Cui, MM; Tao, J; Tyrrell, DL; Zhang, XE; Zhang, HQ; Le, XC                                                     | Molecular Diagnosis of COVID-19: Challenges and Research Needs                                                                                                | C1, C2, C3          | N  | N  | N  |
| Odi, EE; Afolayan, AO; Akintayo, I; Okeke, IN                                                                                                                                                                   | Could Water and Sanitation Shortfalls Exacerbate SARS-CoV-2 Transmission Risks?                                                                               | C1, C2, C3          | N  | N  | N  |
| Chaudhry, AK; Sachdeva, P                                                                                                                                                                                       | Coronavirus disease 2019 (COVID-19): a new challenge in untreated wastewater                                                                                  | C1, C2, C3          | N  | N  | N  |
| Mlejnkova, H; Sovova, K; Vasickova, P; Ocenaskova, V; Jasikova, L; Juranova, E                                                                                                                                  | Preliminary Study of Sars-Cov-2 Occurrence in Wastewater in the Czech Republic                                                                                | C3                  | Y  | Y  | N  |
| Ahmed, W; Angel, N; Edson, J; Bibby, K; Bivins, A; O'Brien, JW; Choi, PM; Kitajima, M; Simpson, SL; Li, JY; Tschärke, B; Verhagen, R; Smith, WJM; Zaugg, JL; Dierens, L; Hugenholtz, P; Thomas, KV; Mueller, JF | First confirmed detection of SARS-CoV-2 in untreated wastewater in Australia: A proof of concept for the wastewater surveillance of COVID-19 in the community | Include             | Y  | Y  | Y  |
| Nunez-Delgado, A                                                                                                                                                                                                | What do we know about the SARS-CoV-2 coronavirus in the environment?                                                                                          | C1, C2, C3          | N  | N  | N  |
| Medema, G; Heijnen, L; Elsinga, G; Italiaander, R; Brouwer, A                                                                                                                                                   | Presence of SARS-Coronavirus-2 RNA in Sewage and Correlation with Reported COVID-19 Prevalence in the Early Stage of the Epidemic in The Netherlands          | Include             | Y  | Y  | Y  |
| Aboubakr, HA; Sharafeldin, TA; Goyal, SM                                                                                                                                                                        | Stability of SARS-CoV-2 and other coronaviruses in the environment and on common touch surfaces and the influence of climatic conditions: A review            | C1, C2, C3          | N  | N  | N  |

| Author                                                                                                                                                                                                                                                                                      | Title                                                                                                                                                                   | Inclusion/Exclusion | C1 | C2 | C3 |
|---------------------------------------------------------------------------------------------------------------------------------------------------------------------------------------------------------------------------------------------------------------------------------------------|-------------------------------------------------------------------------------------------------------------------------------------------------------------------------|---------------------|----|----|----|
| Ahmed, W; Bertsch, PM; Angel, N; Bibby, K; Bivins, A; Dierens, L; Edson, J; Ehret, J; Gyawali, P; Hamilton, KA; Hosegood, I; Hugenholtz, P; Jiang, GM; Kitajima, M; Sichani, HT; Shi, JH; Shimko, KM; Simpson, SL; Smith, WJM; Symonds, EM; Thomas, KV; Verhagen, R; Zaugg, JL; Mueller, JF | Detection of SARS-CoV-2 RNA in commercial passenger aircraft and cruise ship wastewater: a surveillance tool for assessing the presence of COVID-19 infected travellers | C3                  | Y  | Y  | N  |
| Wu, FQ; Zhang, JB; Xiao, A; Gu, XQ; Lee, WL; Armas, F; Kauffman, K; Hanage, W; Matus, M; Ghaeli, N; Endo, N; Duvallet, C; Poyet, M; Moniz, K; Washburne, AD; Erickson, T; Chai, P; Thompson, J; Alm, E                                                                                      | SARS-CoV-2 Titers in Wastewater Are Higher than Expected from Clinically Confirmed Cases                                                                                | C3                  | Y  | Y  | N  |
| Lancaster, K; Rhodes, T                                                                                                                                                                                                                                                                     | Wastewater monitoring of SARS-CoV-2: lessons from illicit drug policy                                                                                                   | C1, C2, C3          | N  | N  | N  |
| Ali, M; Zaid, M; Saqib, MAN; Ahmed, H; Afzal, MS                                                                                                                                                                                                                                            | SARS-CoV-2 and the hidden carriers: Sewage, feline, and blood transfusion                                                                                               | C1, C2, C3          | N  | N  | N  |
| Almeida, A; Faustino, MAF; Neves, MGPMS                                                                                                                                                                                                                                                     | Antimicrobial Photodynamic Therapy in the Control of COVID-19                                                                                                           | C1, C2, C3          | N  | N  | N  |
| Lodder, W; Husman, AMD                                                                                                                                                                                                                                                                      | SARS-CoV-2 in wastewater: potential health risk, but also data source                                                                                                   | C1, C2, C3          | N  | N  | N  |
| Wang, J; Feng, HT; Zhang, S; Ni, ZW; Ni, LM; Chen, Y; Zhuo, LX; Zhong, ZF; Qu, TT                                                                                                                                                                                                           | SARS-CoV-2 RNA detection of hospital isolation wards hygiene monitoring during the Coronavirus Disease 2019 outbreak in a Chinese hospital                              | C1, C2, C3          | N  | N  | N  |



| <b>Author</b>                                                                     | <b>Title</b>                                                                                                   | <b>Inclusion/Exclusion</b> | <b>C1</b> | <b>C2</b> | <b>C3</b> |
|-----------------------------------------------------------------------------------|----------------------------------------------------------------------------------------------------------------|----------------------------|-----------|-----------|-----------|
| da Silva, RR; dos Santos, MB; dos Santos, AD; Tavares, DD; dos Santos, PL         | Coronavirus disease and basic sanitation: too early to be worried?                                             | C1, C2, C3                 | N         | N         | N         |
| Prado, T; Fumian, TM; Mannarino, CF; Maranhao, AG; Siqueira, MM; Miagostovich, MP | Preliminary results of SARS-CoV-2 detection in sewerage system in Niteroi municipality, Rio de Janeiro, Brazil | C3                         | Y         | Y         | N         |

**Table S3.** Pearson's regression coefficients for individual and grouped studies correlating SARS-CoV-2 measurements in wastewater (copies / mL ) with COVID-19 case data of associated locations.

---



---

**Daily new COVID-19 cases per 100,000 inhabitants**

| <b>Author</b>                | <b>Coefficient</b> | <b>95%-CI</b> |
|------------------------------|--------------------|---------------|
| D'Aoust, P.M et al.          | 0.71               | [0.52;0.84]   |
| Graham, K et al.             | 0.59               | [0.48;0.68]   |
| Scherchan, S.P et al (S)     | 0.27               | [-0.11;0.59]  |
| Peccia, J et al.             | 0.40               | [0.29;0.51]   |
| Hata, A et al.               | 0.22               | [0.01;0.41]   |
| Miyani, B et al.             | -0.11              | [-0.44;0.23]  |
| Haramoto, E et al            | -0.06              | [-0.38;0.27]  |
| Trottier, J et al            | 0.05               | [-0.49;0.56]  |
| Nemudryi, A et al.           | -0.05              | [-0.38;0.29]  |
| Random effects model         | 0.28               | [0.01; 0.51]  |
| Number of studies = 9        |                    |               |
| Number of observations = 666 |                    |               |

**Cumulative COVID-19 cases per 100,000 inhabitants**

| <b>Author</b>                | <b>Coefficient</b> | <b>95%-CI</b> |
|------------------------------|--------------------|---------------|
| Gonzalez, R et al.           | 0.78               | [0.97;1.13]   |
| Medema, G et al              | 0.63               | [0.51;0.97]   |
| Sherchan, S.P et al.         | 0.20               | [-0.18;0.60]  |
| Haramoto, E et al.           | -0.28              | [-0.63;0.05]  |
| Hata, A et al.               | 0.17               | [-0.04;0.38]  |
| Westhaus, S et al.           | -0.11              | [-0.62;0.39]  |
| Randazzo, W et al (b)        | 0.08               | [-0.22;0.40]  |
| Random effects model         | 0.29               | [-0.15; 0.73] |
| Number of studies = 7        |                    |               |
| Number of observations = 880 |                    |               |

---



---
